# Supplementary material for: How Depressive Symptoms Hinder Positive Information Processing: An Experimental Study on the Interplay of Cognitive Immunisation and Negative Mood in the Context of Expectation Adjustment
Source: Springer Nature journal article supplement (doi:10.1007/s10608-020-10191-4), 2020-12-22
Supplement: MOESM1 [file 18708320]

**Supplementary Material**

Article title: How depressive symptoms hinder positive information processing – An experimental study on the interplay of cognitive immunisation and negative mood in the context of expectation update

# Data Screening and Pre-Analyses

First, we conducted data screening according to the recommendations of Tabachnick and Fidell (2014) and tested the assumptions of analyses of variance (ANOVAs). Univariate outliers were inspected via standardized values of measured variables and their histograms (Kline, 2005). Multivariate outliers were inspected via Mahalanobis distance and Cook’s distance, as suggested by Cohen, Cohen, West, and Aiken (2003) and Stevens (2002). Since the Missing Completely At Random (MCAR) test indicated non-significant results, missing values could be estimated using the Expectation Maximization (EM) procedure according to Tabachnick and Fidell (2014). The amount of missing values was very low (0.17%).

We conducted a multivariate analysis of variance (MANOVA) to examine possible baseline differences between the four experimental conditions (Control group vs. *Immunisation* vs. *Affect* vs. *Immunisation + Affect*) in initial expectations, TEMINT performance, depressive symptoms, and age. To examine the effects of the mood induction vs. distraction in terms of a manipulation check, we performed a 4 (Condition: Control group vs. *Immunisation* vs. *Affect* vs. *Immunisation + Affect*) × 2 (Time: before feedback vs. after feedback) factorial ANOVA. Further, to examine group differences in the engagement in cognitive immunisation strategies, we conducted one-way ANOVA (Control group vs. *Immunisation* vs. *Affect* vs. *Immunisation + Affect*) using the CIPF total score as the dependent variable.

# Additional results

# Examination of Baseline Differences

A MANOVA indicated that participants from the four experimental groups did not differ at baseline, *F*(5, 144) = 0.472, *p* = .954; *ɳ²p* = .016. Specifically, they did not differ in initial generalised expectations, *F*(3, 148) = 0.082, *p* = .970; *ɳ²p* = .002, task-specific expectations, *F*(3, 148) = 0.039, *p* = .990; *ɳ²p* = .001, age, *F*(3, 148) = 1.605, *p* = .191; *ɳ²p* = .031, BDI sum score, *F*(3, 148) = 0.422, *p* = .738; *ɳ²p* = .008. Importantly, the four conditions did also not differ on TEMINT performance, *F*(3, 148) = 0.464, *p* = .708; *ɳ²p* = .009. The distribution of male and female participants was not significantly different across the four groups, *χ*² = 3.123, *p* = .373, nor was the distribution of educational level, *χ*² = 13.034, *p* = .161, and employment status, *χ*² = 15.460, *p* = .217.

# Analyses of Potential Confounding variables

To control for the effects of possible confounding variables, we performed four separate analyses of covariance (ANCOVA) based on the main analyses as described in the manuscript and considered each ruminative response style (RSQ_RUM and RSQ_DIS, respectively), dispositional optimism (LOT-R) and TEMINT sum scores as a covariate. The inclusion of these variables did not change the pattern of the results. That is, none of them had unique effects on the dependent variable, nor did they change the significance of any of the other main or interaction effects. Also, effect sizes for the ANCOVAs were similar to those for the main analyses (that is, the three-way ANOVAs).

# References

Cohen, J., Cohen, P., West, S. G., & Aiken, L. S. (2003). *Applied multiple regression/ correlation analysis for the behavioral sciences* (3rd ed.). Mahawah, NJ: Erlbaum.

Kline, R. B. (2005). *Principles and practice of structural equation modeling* (2nd ed.). New York: Guilford.

Stevens, J. (2002). *Applied multivariate statistics for the social sciences* (2nd ed.). Hillsdale, NJ: Erlbaum.

Tabachnick, B. G., & Fidell, L. S. (2014). *Using multivariate statistics* (6th ed.). Harlow, England: Pearson.
